# Supplementary material for: Additive methods for genomic signatures
Source: PubMed Central journal article supplement (PMC4994249; doi:10.1186/s12859-016-1157-8), 2016-08-22
Supplement: 12859_2016_1157_MOESM1_ESM.pdf [file 12859_2016_1157_MOESM1_ESM.pdf]

Additional file 1

## Additive Methods for Genomic Signatures

Rallis Karamichalis, Lila Kari, Stavros Konstantinidis,  
Steffen Kopecki and Stephen Solis-Reyes

The 42 genomes analyzed in the Results section, and the two genomes exemplified in the Remarks subsection: Scientific name, number of chromosomes, NCBI accession number. (\* *P.patens* genome from JGI Phytozome).

#### Animalia

| Organism                       | # Chrom. | # fragm. | Accession                 |
|--------------------------------|----------|----------|---------------------------|
| <i>Homo sapiens</i>            | 24       | 480      | GCF_000001405.30          |
| <i>Drosophila melanogaster</i> | 7        | 128      | GCA_000001215.4           |
| <i>Gallus gallus</i>           | 31       | 562      | GCA_000002315.2           |
| <i>Mus musculus</i>            | 21       | 420      | GCA_000001635.5           |
| <i>Microcebus murinus</i>      | Contigs  | 500      | ABDC02000001-ABDC02056281 |
| <i>Tarsius syrichta</i>        | Contigs  | 500      | ABRT02000001-ABRT02492902 |
| <i>Callithrix jacchus</i>      | 24       | 477      | GCA_000004665.1           |
| <i>Papio anubis</i>            | 21       | 420      | GCF_000264685.2           |
| <i>Nomascus leucogenys</i>     | 26       | 520      | GCA_000146795.3           |
| <i>Pongo abelii</i>            | 24       | 480      | GCF_000001545.4           |
| <i>Gorilla gorilla gorilla</i> | 24       | 480      | GCA_000151905.1           |
| <i>Pan troglodytes</i>         | 25       | 500      | GCA_000001515.4           |

#### Fungi

| Organism                        | # Chrom. | # fragm. | Accession       |
|---------------------------------|----------|----------|-----------------|
| <i>Saccharomyces cerevisiae</i> | 16       | 73       | GCF_000146045.2 |
| <i>Cryptococcus gattii</i>      | 14       | 114      | GCA_000185945.1 |
| <i>Fusarium oxysporum</i>       | 15       | 265      | GCA_000149955.2 |
| <i>Komagataella pastoris</i>    | 4        | 58       | GCA_000027005.1 |
| <i>Candida dubliniensis</i>     | 8        | 93       | GCA_000026945.1 |
| <i>Saccharomyces arboricola</i> | 16       | 66       | GCA_000292725.1 |

#### Plantae

| Organism                                                      | # Chrom. | # fragm. | Accession         |
|---------------------------------------------------------------|----------|----------|-------------------|
| <i>Brassica Napus</i>                                         | 19       | 380      | GCF_000686985.1   |
| <i>Micromonas sp. RCC299</i>                                  | 17       | 131      | GCF_000090985.2   |
| <i>Physcomitrella patens</i>                                  | 27       | 540      | *                 |
| <i>Malus domestica</i>                                        | 17       | 340      | GCF_000148765.1   |
| <i>Carica papaya</i>                                          | Scaffold | 231      | DS981520-DS984726 |
| <i>Arabidopsis thaliana</i>                                   | 5        | 100      | GCF_000001735.3   |
| <i>Raphanus sativus</i>                                       | Scaffold | 375      | DF196826-DF236948 |
| <i>Brassica oleracea</i>                                      | 9        | 180      | GCF_000695525.1   |
| <i>Capsicum annuum L, cultivar Zunla-1</i>                    | 12       | 240      | GCA_000710875.1   |
| <i>Capsicum annuum var. glabriusculum, cultivar Chiltepin</i> | 12       | 240      | GCA_000950795.1   |

#### Protista

| Organism                     | # Chrom. | # fragm. | Accession                 |
|------------------------------|----------|----------|---------------------------|
| <i>Plasmodium falciparum</i> | 14       | 149      | GCA_000002765.1           |
| <i>Oxytricha trifallax</i>   | Contigs  | 122      | ARYC01000001-ARYC01025720 |
| <i>Toxoplasma gondii</i>     | Contigs  | 126      | AAYL02000001-AAYL02002110 |
| <i>Theileria orientalis</i>  | 4        | 58       | GCA_000740895.1           |
| <i>Plasmodium vivax</i>      | 14       | 142      | GCA_000002415.2           |

#### Bacteria

| Organism                       | # Chrom. | # fragm. | Accession       |
|--------------------------------|----------|----------|-----------------|
| <i>Escherichia coli</i>        | 1        | 20       | GCA_000183345.1 |
| <i>Staphylococcus aureus</i>   | 1        | 18       | GCA_000013425.1 |
| <i>Helicobacter pylori</i>     | 1        | 11       | GCA_000008525.1 |
| <i>Acinetobacter baumannii</i> | 1        | 20       | GCA_000018445.1 |
| <i>Salmonella enterica</i>     | 1        | 20       | GCA_000006945.1 |
| <i>Escherichia fergusonii</i>  | 1        | 20       | GCA_000026225.1 |

#### Archaea

| Organism                          | # Chrom. | # fragm. | Accession       |
|-----------------------------------|----------|----------|-----------------|
| <i>Pyrococcus furiosus</i>        | 1        | 12       | GCA_000275605.1 |
| <i>Sulfolobus islandicus</i>      | 1        | 18       | GCA_000022385.1 |
| <i>Methanobrevibacter smithii</i> | 1        | 12       | GCA_000016525.1 |
| <i>Thermococcus sp. AM4</i>       | 1        | 13       | GCA_000151205.2 |
| <i>Pyrococcus yayanosii</i>       | 1        | 11       | GCA_000215995.1 |
